# Supplementary material for: Intravenous fentanyl self-administration in male and female C57BL/6J and DBA/2J mice
Source: PubMed Central journal article supplement (PMC9842734; doi:10.1038/s41598-023-27992-8), 2023-01-16
Supplement: 41598_2023_27992_MOESM1_ESM.pdf [file 41598_2023_27992_MOESM1_ESM.pdf]

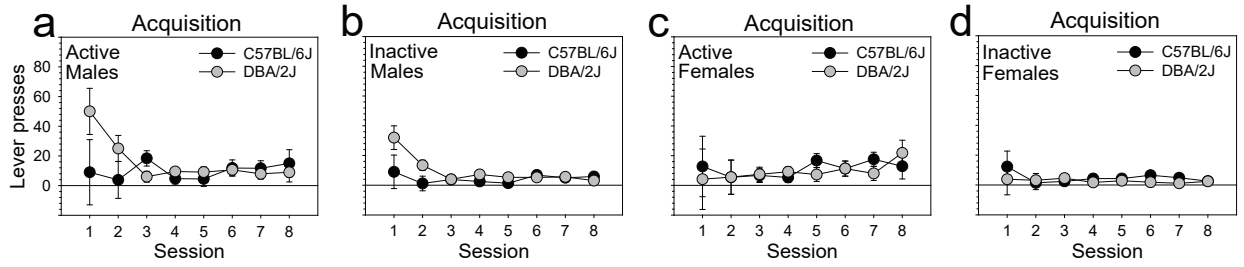

**Figure S1. Acquisition of intravenous fentanyl self-administration. (a, b, c, d)** Performance of C57BL/6J and DBA/2J strains did not differ significantly on the acquisition stage.

Data are presented as the mean  $\pm$  S.E.M.

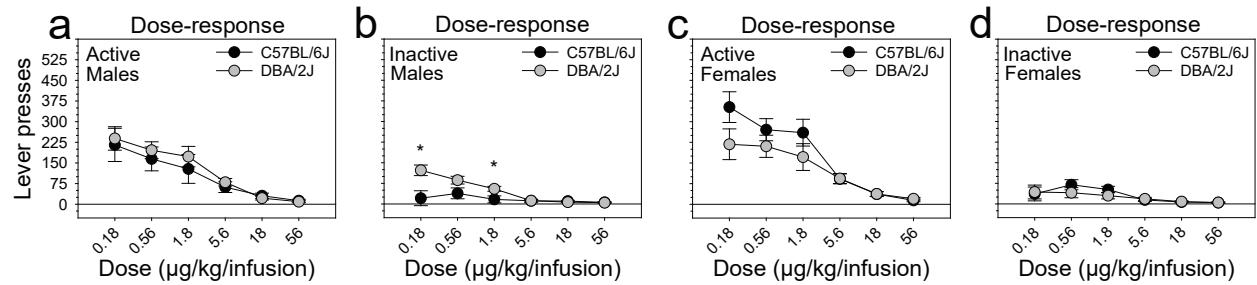

**Figure S2. Intravenous fentanyl self-administration dose-response. (a, b, c, d)** Male, but not female, DBA/2J mice pressed the inactive lever, but not active lever, significantly more than male C57BL/6J mice on two doses.

Data are presented as the mean  $\pm$  S.E.M.

\*  $p < .05$

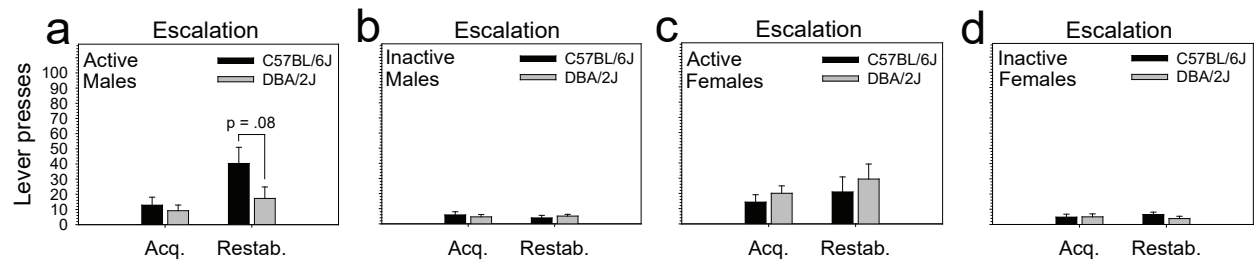

**Figure S3. Escalation of intravenous fentanyl self-administration. (a, b)** The difference in active lever presses, but not inactive lever presses, between male C57BL/6J mice and male DBA/2J mice on the restabilization stage approached statistical significance ( $p = .08$ ). **(c, d)** This strain difference was not observed in female mice.

Data are presented as the mean  $\pm$  S.E.M.

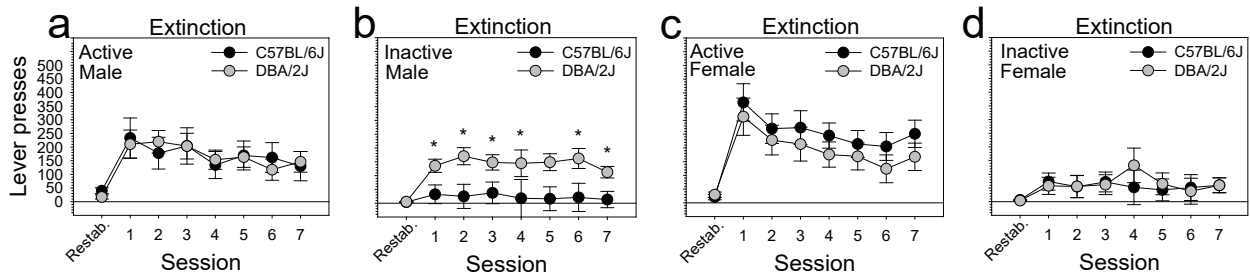

**Figure S4. Extinction of intravenous fentanyl self-administration. (a, b, c, d)** No significant effects of strain, sex, or their interaction term were observed in the ANOVA. However, post hoc tests indicated that male DBA/2J mice emitted significantly more inactive lever presses than male C57BL/6J mice.

Data are presented as the mean  $\pm$  S.E.M.

\*  $p < .05$

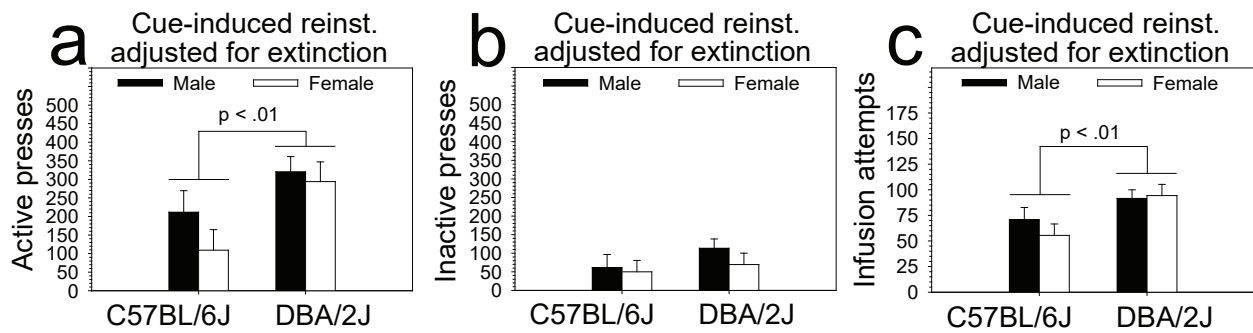

**Figure S5. Cue-induced reinstatement following extinction of intravenous fentanyl self-administration.** (a, b) Lever presses and (c) infusions on the cue-induced reinstatement session after adjusting for performance on the previous extinction session using ANCOVA. DBA/2J mice emitted significantly more active lever presses ( $p < .01$ ), but not inactive lever presses, and intravenously self-administered more infusions ( $p < .01$ ) relative to C57BL/6J mice. Sex did not significantly influence this effect.

Data are presented as the mean  $\pm$  S.E.M.

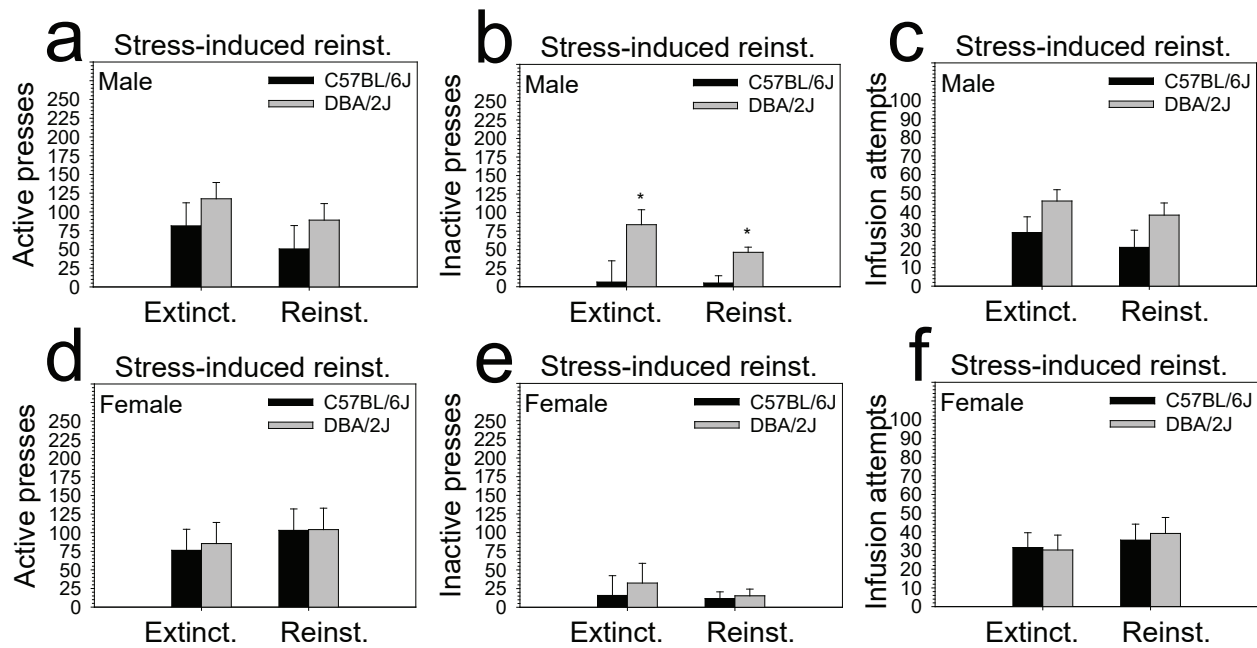

**Figure S6. Stress-induced reinstatement following extinction of intravenous fentanyl self-administration.** (a, b, c, d, e, f) ANOVA did not reveal significant effects of strain. However, post hoc tests indicated that male DBA/2J mice emitted significantly more inactive lever presses relative to male C57BL/6J mice on both extinction and reinstatement stages. No other statistically significant strain differences were detected.

Data are presented as the mean  $\pm$  S.E.M.

\*  $p < .05$

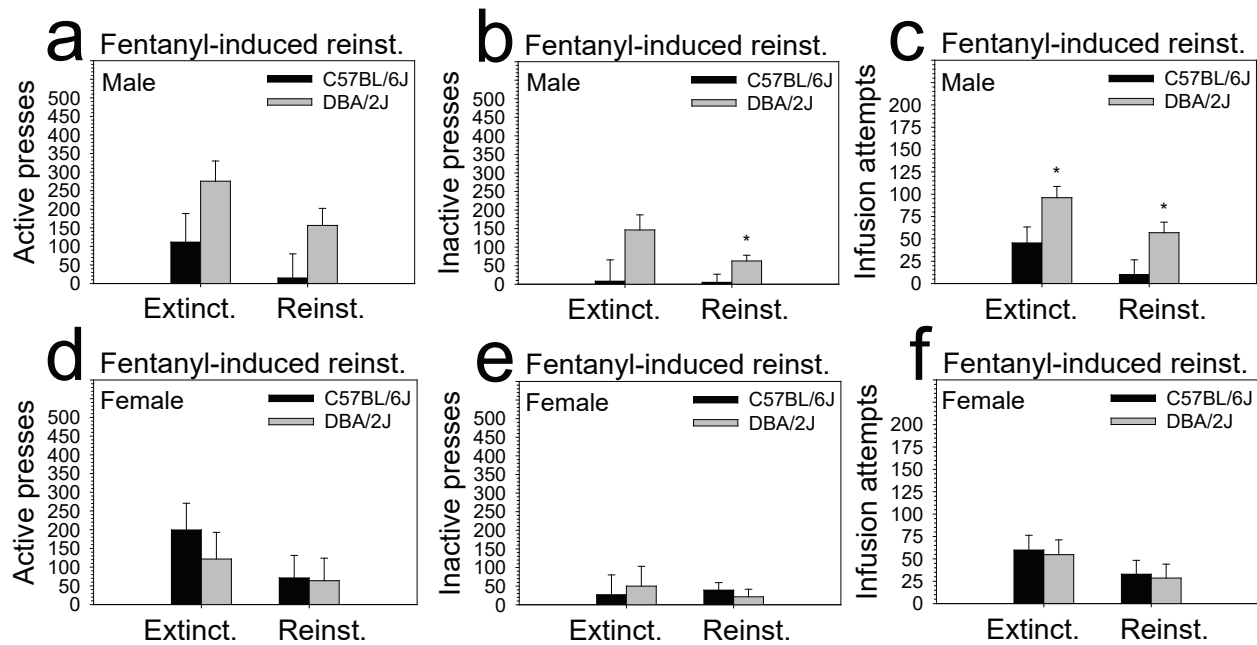

**Figure S7. Fentanyl-induced reinstatement following extinction of intravenous fentanyl self-administration.** (a, b, c) We observed a statistically significant interaction of strain and sex on lever pressing [ $F(1, 28) = 6.99, p < .05$ ] and a marginally significant interaction of strain and sex on infusions [ $F(1, 28) = 3.97, p = .06$ ]. These interactions were driven by relatively higher lever presses and infusions in male DBA/2J mice relative to male C57BL/6J mice on both extinction and reinstatement sessions. (d, e, f) These relationships were not observed in female mice. Importantly, neither strain nor sex interacted with stage.

Data are presented as the mean  $\pm$  S.E.M.

\*  $p < .05$
